# Supplementary material for: Switch Rates During Acute Treatment for Bipolar II Depression With Lithium, Sertraline, or the Two Combined: A Randomized Double-Blind Comparison
Source: Atypon-hosted journal article supplement (doi:10.1176/appi.ajp.2016.15040558), 2017-01-31
Supplement: appi.ajp.2016.15040558.ds001.pdf [file appi.ajp.2016.15040558.ds001.pdf]

**FIGURE S1. Participant Flow Diagram: Switch rates during lithium monotherapy, sertraline monotherapy and lithium/sertraline combination therapy for the acute treatment of bipolar II depression: a randomized, double-blind comparison**

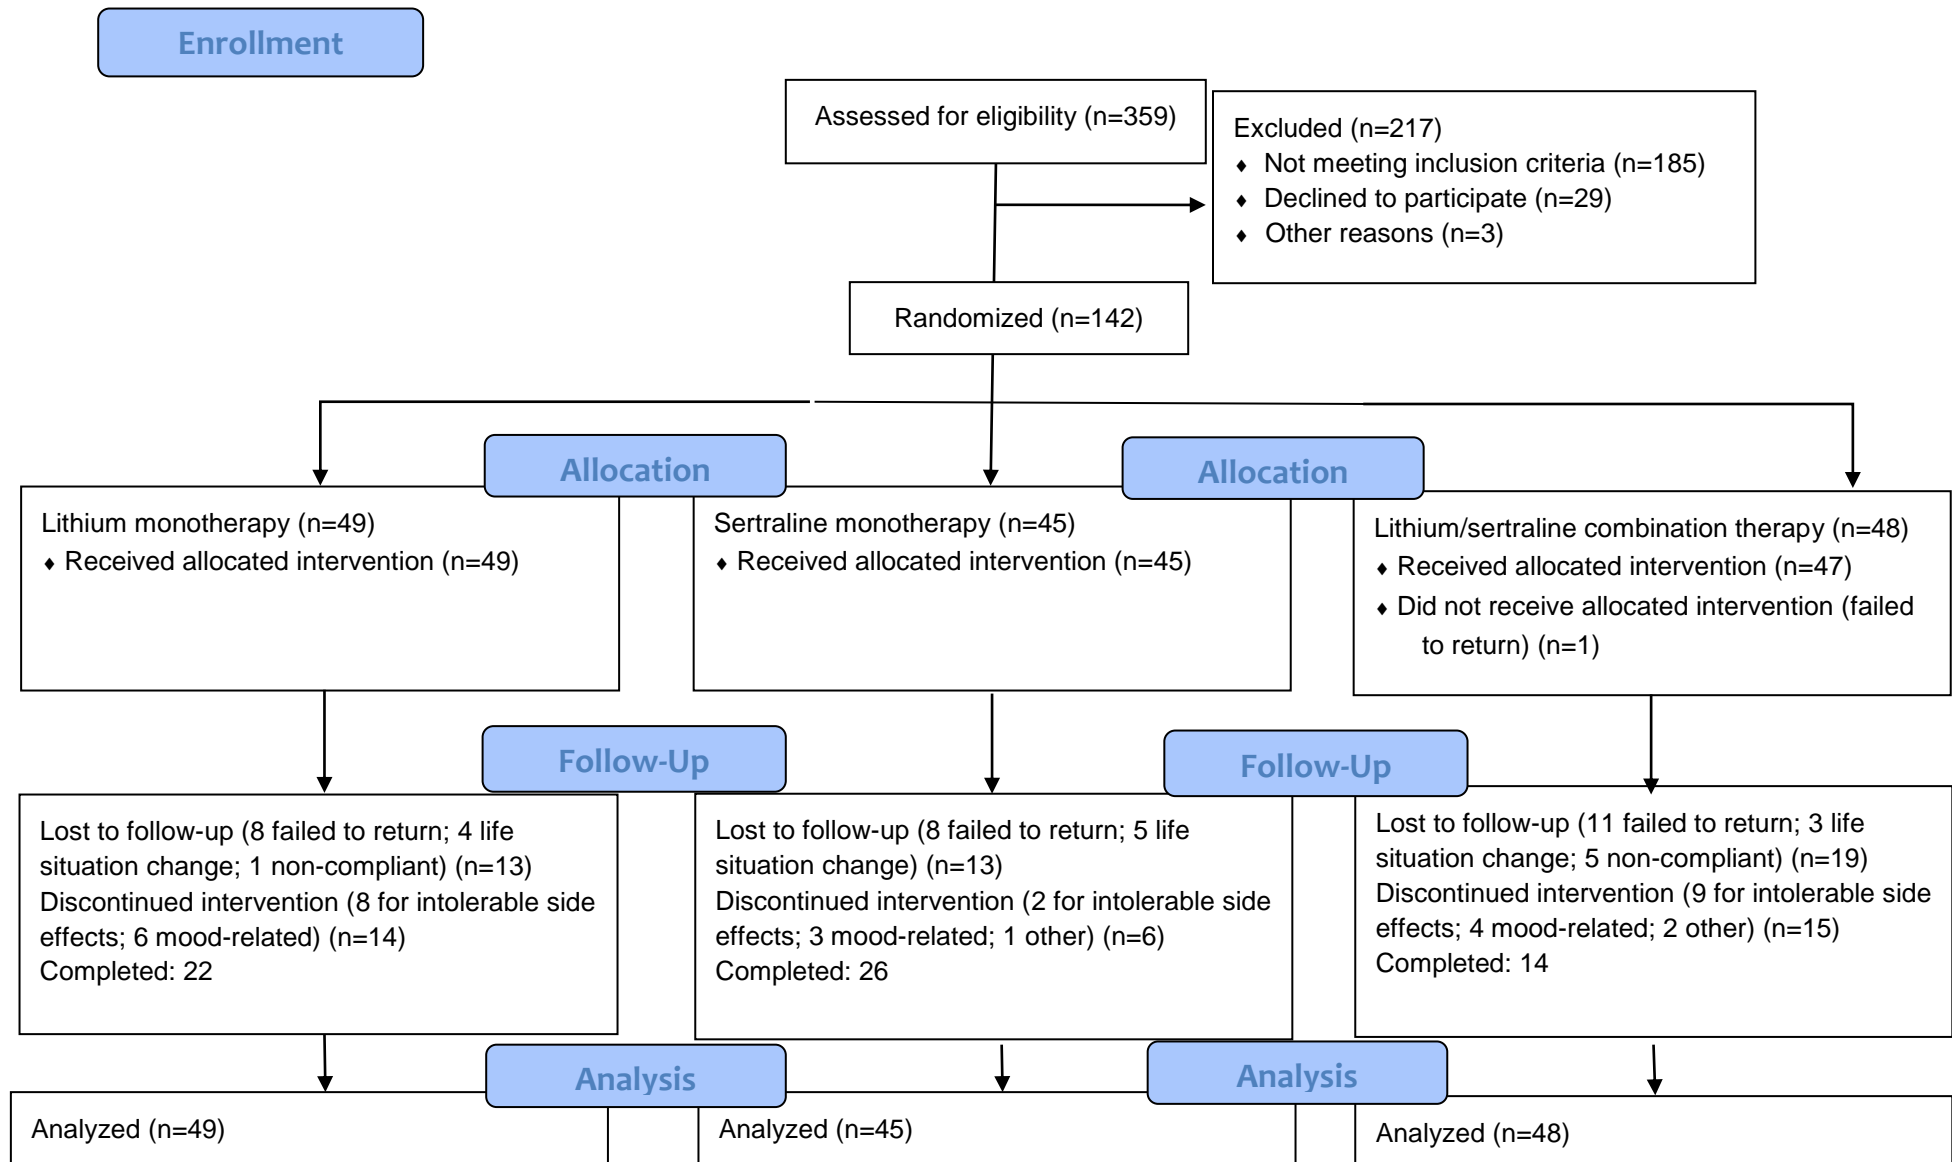

TABLE S1. Demographic and Clinical Variables by Site

|                                             | Total (N=142) |          | UCLA (N=51) |          | Palo Alto / UTSW (N=49) |          | UCCM (N=42) |          | P*     |
|---------------------------------------------|---------------|----------|-------------|----------|-------------------------|----------|-------------|----------|--------|
| <b>Demographic Variables</b>                | mean          | ± SD     | mean        | ± SD     | mean                    | ± SD     | mean        | ± SD     |        |
| Age (years)                                 | 38.6          | 11.8     | 39.8        | 11.3     | 39.8                    | 13.3     | 35.8        | 10.4     | 0.182  |
|                                             | <b>n</b>      | <b>%</b> | <b>n</b>    | <b>%</b> | <b>n</b>                | <b>%</b> | <b>n</b>    | <b>%</b> |        |
| Gender (female)                             | 77            | 54.2     | 22          | 43.1     | 27                      | 55.1     | 28          | 66.7     | 0.076  |
| Ethnicity (Hispanic)                        | 18            | 13.0     | 8           | 15.7     | 9                       | 19.2     | 1           | 2.5      | 0.046  |
| Race                                        |               |          |             |          |                         |          |             |          | 0.003  |
| Caucasian                                   | 97            | 68.3     | 28          | 54.9     | 33                      | 67.4     | 36          | 85.7     |        |
| African American                            | 18            | 12.7     | 11          | 21.6     | 3                       | 6.1      | 4           | 9.5      |        |
| Mixed / Other                               | 27            | 19.0     | 12          | 23.5     | 13                      | 26.5     | 2           | 4.8      |        |
| Married / Cohabiting                        | 48            | 33.8     | 13          | 25.5     | 16                      | 32.7     | 19          | 45.2     | 0.131  |
| Employed                                    | 62            | 43.7     | 23          | 45.1     | 22                      | 44.9     | 17          | 40.5     | 0.884  |
| Highest education attained                  |               |          |             |          |                         |          |             |          | 0.054  |
| Some high school                            | 4             | 2.8      | 1           | 2.0      | 0                       | 0.0      | 3           | 7.1      |        |
| High school or GED                          | 19            | 13.4     | 3           | 5.9      | 7                       | 14.3     | 9           | 21.4     |        |
| < 4 year college degree                     | 77            | 54.2     | 28          | 54.9     | 27                      | 55.1     | 22          | 52.4     |        |
| 4 year college degree                       | 22            | 15.5     | 13          | 25.5     | 5                       | 10.2     | 4           | 9.5      |        |
| Graduate/Pro- fessional school              | 20            | 14.1     | 6           | 11.8     | 10                      | 20.4     | 4           | 9.5      |        |
| <b>Clinical Variables</b>                   | mean          | ± SD     | mean        | ± SD     | mean                    | ± SD     | mean        | ± SD     |        |
| Age of onset - depression (years)           | 16.9          | 9.5      | 17.2        | 9.7      | 17                      | 10.4     | 16.5        | 8.5      | 0.948  |
| Age of onset - hypomania (years)            | 20.1          | 8.8      | 20.3        | 7.6      | 20.1                    | 10.9     | 19.9        | 8.0      | 0.972  |
| Age at diagnosis (years)                    | 30.5          | 11.9     | 30.4        | 11.5     | 33.6                    | 12.8     | 27.4        | 10.9     | 0.052  |
| Time since first symptoms (years)           | 23.5          | 12.4     | 23.8        | 12.1     | 25.9                    | 12.4     | 20.4        | 10.0     | 0.110  |
| Duration of illness (years since diagnosis) | 8             | 8.7      | 9.4         | 9.2      | 5.9                     | 7.4      | 8.4         | 8.9      | 0.134  |
| Baseline IDS-C                              | 32.9          | 8.4      | 32.5        | 7.2      | 34.3                    | 10.5     | 31.6        | 6.9      | 0.276  |
| Baseline Young Mania Rating Scale score     | 5.2           | 2.9      | 3.5         | 2.1      | 5.4                     | 2.7      | 6.9         | 3.1      | <0.001 |
| Baseline CGI- bipolar depression severity   | 4.3           | 0.8      | 4.5         | 0.9      | 3.9                     | 0.6      | 4.3         | 0.8      | <0.001 |
|                                             | <b>n</b>      | <b>%</b> | <b>n</b>    | <b>%</b> | <b>n</b>                | <b>%</b> | <b>n</b>    | <b>%</b> |        |

|                       |    |       |    |      |    |      |    |      |       |
|-----------------------|----|-------|----|------|----|------|----|------|-------|
| Rapid Cycling         | 59 | 41.6  | 22 | 43.1 | 18 | 36.7 | 19 | 45.2 | 0.685 |
| Dropped out of study  |    |       |    |      |    |      |    |      |       |
| Overall               | 80 | 56.3  | 24 | 47.1 | 32 | 66.0 | 24 | 57.1 | 0.392 |
| Due to side effects** | 19 | 23.75 | 7  | 29.2 | 10 | 31.3 | 2  | 8.33 | 0.100 |

\* p values are from ANOVAs for continuous variables or Pearson chi-squared tests for categorical variables except for ethnicity, race, education and drop out due to side effects for which nonparametric tests were used due to small expected cell counts

\*\*Percentages are out of the total number of dropouts

SD: Standard Deviation; IDS-C: Inventory of Depressive Symptoms, Clinician-Rated; CGI: Clinical Global Impressions; ANOVA: Analysis of Variance

please spell out acronyms in footnotes here and under every other table and figure

**TABLE S2. Reasons for Early Study Discontinuation by Treatment Group**

|                                         | Total (N=80) | Lithium (N=27) | Sertraline (N=19) | Combination (N=34) |
|-----------------------------------------|--------------|----------------|-------------------|--------------------|
| <b>Reason for Early Discontinuation</b> | <b>n</b>     | <b>n</b>       | <b>n</b>          | <b>n</b>           |
| Lost to Follow-up                       | 45           | 13             | 13                | 19                 |
| ■ Failed to return                      | 27           | 8              | 8                 | 11                 |
| ■ Change in life situation              | 12           | 4              | 5                 | 3                  |
| ■ Noncompliant                          | 6            | 1              | 0                 | 5                  |
| Side effects                            | 19           | 8              | 2                 | 9                  |
| Mood-Related                            | 13           | 6              | 3                 | 4                  |
| ■ Lack of mood improvement (depression) | 7            | 5              | 0                 | 2                  |
| ■ Hypomania                             | 5            | 1              | 2                 | 2                  |
| ■ Mixed depression and hypomania        | 1            | 0              | 1                 | 0                  |
| ■ Mania                                 | 0            | 0              | 0                 | 0                  |
| Other Reasons                           | 3            | 0              | 1                 | 2                  |

**TABLE S3. Rates of Baseline\* and Treatment-Emergent Side Effects by Treatment Group**

|                                           | TOTAL N=142  | Lithium N=49 | Sertraline N=45 | Combo N=48   | p**   |
|-------------------------------------------|--------------|--------------|-----------------|--------------|-------|
| <b>Baseline Physical Symptoms</b>         | <b>n (%)</b> | <b>n (%)</b> | <b>n (%)</b>    | <b>n (%)</b> |       |
| Thirst                                    | 11 (7.8)     | 3 (6.1)      | 3 (6.7)         | 5 (10.4)     | 0.516 |
| Tremor                                    | 2 (1.4)      | 1 (2.0)      | 1 (2.2)         | 0 (0.0)      | 0.997 |
| Gastrointestinal                          | 14 (9.9)     | 6 (12.2)     | 4 (8.9)         | 4 (8.3)      | 0.613 |
| Urinary frequency                         | 9 (6.3)      | 2 (4.1)      | 4 (8.9)         | 3 (6.3)      | 0.679 |
| Sexual dysfunction                        | 6 (4.2)      | 2 (4.1)      | 2 (4.4)         | 2 (4.2)      | 0.886 |
| Central Nervous System                    | 49 (34.5)    | 20 (40.8)    | 16 (35.6)       | 13 (27.1)    | 0.656 |
| Any of the Above Symptoms                 | 62 (43.7)    | 24 (49)      | 21 (46.7)       | 17 (35.4)    | 0.774 |
| <b>Treatment-Emergent Side Effects***</b> |              |              |                 |              |       |
| Thirst                                    | 44 (31.0)    | 16 (32.7)    | 21 (46.7)       | 7 (14.6)     | 0.012 |
| Tremor                                    | 28 (19.7)    | 9 (18.4)     | 6 (13.3)        | 13 (27.1)    | 0.101 |
| Gastrointestinal                          | 60 (42.3)    | 24 (49.0)    | 17 (37.8)       | 19 (39.6)    | 0.403 |
| Urinary frequency                         | 34 (23.9)    | 18 (36.7)    | 6 (13.3)        | 10 (20.8)    | 0.023 |
| Sexual dysfunction                        | 21 (14.8)    | 3 (6.1)      | 7 (15.6)        | 11 (22.9)    | 0.072 |
| Central Nervous System                    | 31 (21.8)    | 9 (18.4)     | 10 (22.2)       | 12 (25.0)    | 0.590 |
| Any of the Above Side Effects             | 97 (68.3)    | 35 (71.4)    | 31 (68.9)       | 31 (64.6)    | 0.944 |

\* Includes physical symptoms rated at baseline (pretreatment) as moderate or severe

\*\* p values represent treatment effects after adjustment for rapid cycling status, baseline covariates and, for treatment-emergent side effects, time in study

\*\*\* A side effect was considered treatment-emergent if its rating was both worse than the participant's baseline physical symptoms rating in that category and reached a level of moderate to severe
